# Supplementary material
Source: PubMed Central journal article supplement (PMC7878294)
Supplement: NIHMS1635321-supplement-13.pdf [file NIHMS1635321-supplement-13.pdf]

# Figure S2

## Sn-RNA-Seq run summaries

**A**

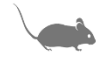

|                              | Duodenum | Ileum   | Colon   | All     |
|------------------------------|----------|---------|---------|---------|
| Approx. Nuclei Encapsulated  | 12884    | 24413   | 30551   | 67848   |
| 10X Total Runs               | 2        | 4       | 3       | 9       |
| inDrop Total Runs            | 2        | 2       | 2       | 6       |
| Total Runs                   | 4        | 6       | 5       | 15      |
| 10x Total Nuclei             | 5394     | 8291    | 14271   | 27956   |
| inDrop Total Nuclei          | 1756     | 3570    | 3328    | 8654    |
| Total Nuclei Pre-cleaning    | 7150     | 11861   | 17599   | 36610   |
| Total Nuclei Post-cleaning * | 6217     | 8379    | 10612   | 25208   |
| Total Reads 10x              | 7.8E+08  | 1.8E+09 | 9.5E+08 | 3.6E+09 |
| Total Reads inDrop           | 1.7E+08  | 1.3E+08 | 2.5E+08 | 5.5E+08 |
| Total Reads                  | 9.4E+08  | 2.0E+09 | 1.2E+09 | 4.1E+09 |

**B**

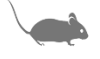

**Duodenum**

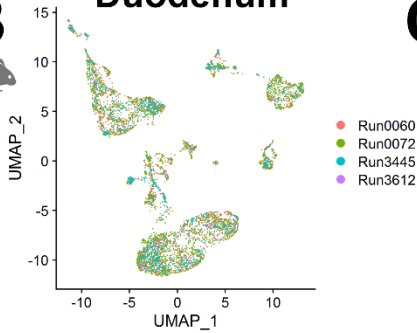

**C**

**Ileum**

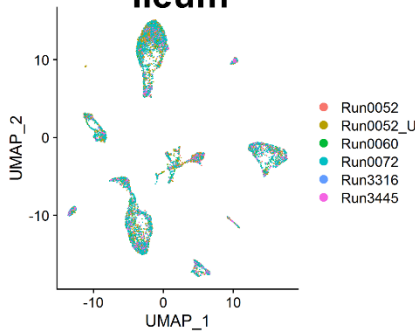

**D**

**Colon**

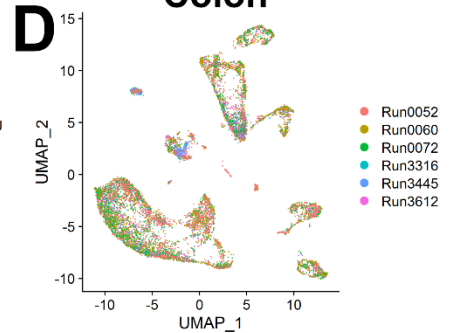

**E**

**Duo**

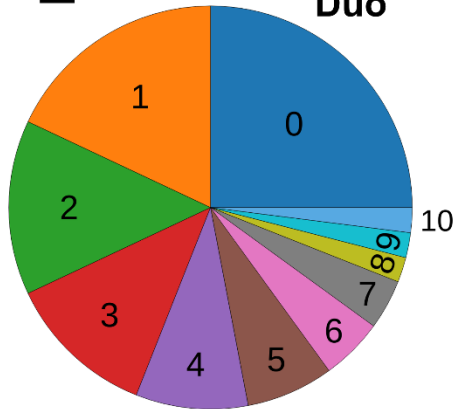

**F**

**Ile**

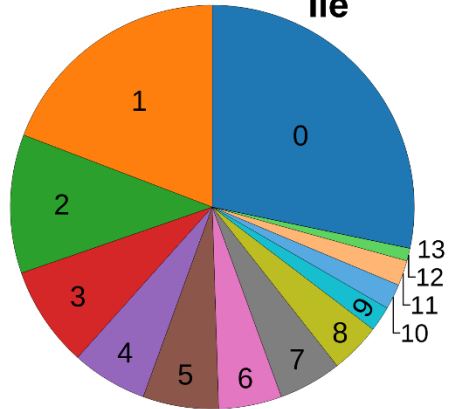

**G**

**Col**

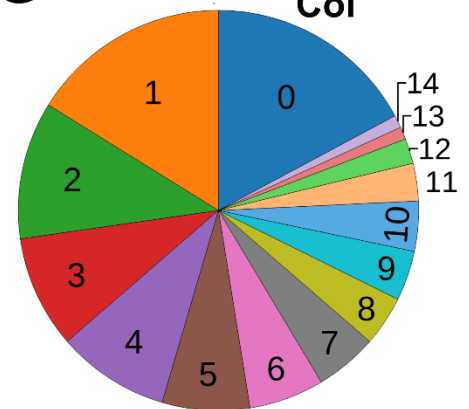

**H**

Cluster composition (% Total)

| Cluster | Duodenum | Ileum | Colon |
|---------|----------|-------|-------|
| 0       | 24.6%    | 28.5% | 17.5% |
| 1       | 18.2%    | 19.0% | 16.2% |
| 2       | 13.6%    | 11.4% | 10.7% |
| 3       | 11.8%    | 7.8%  | 9.2%  |
| 4       | 8.9%     | 6.4%  | 8.8%  |
| 5       | 7.2%     | 5.9%  | 7.1%  |
| 6       | 5.2%     | 5.1%  | 5.9%  |
| 7       | 4.3%     | 4.6%  | 5.1%  |
| 8       | 2.4%     | 4.4%  | 4.5%  |
| 9       | 2.3%     | 2.3%  | 4.3%  |
| 10      | 1.5%     | 1.8%  | 4.2%  |
| 11      | -        | 1.7%  | 3.0%  |
| 12      | -        | 0.6%  | 1.8%  |
| 13      | -        | 0.4%  | 1.3%  |
| 14      | -        | -     | 0.6%  |

**I**

Cluster composition (Total Nuclei)

| Cluster | Duodenum | Ileum | Colon |
|---------|----------|-------|-------|
| 0       | 1531     | 2388  | 1856  |
| 1       | 1132     | 1594  | 1714  |
| 2       | 848      | 959   | 1133  |
| 3       | 731      | 650   | 972   |
| 4       | 553      | 534   | 936   |
| 5       | 445      | 491   | 756   |
| 6       | 321      | 429   | 626   |
| 7       | 265      | 386   | 536   |
| 8       | 151      | 367   | 475   |
| 9       | 144      | 195   | 452   |
| 10      | 96       | 155   | 447   |
| 11      | -        | 142   | 320   |
| 12      | -        | 54    | 189   |
| 13      | -        | 35    | 141   |
| 14      | -        | -     | 59    |

# Figure S3

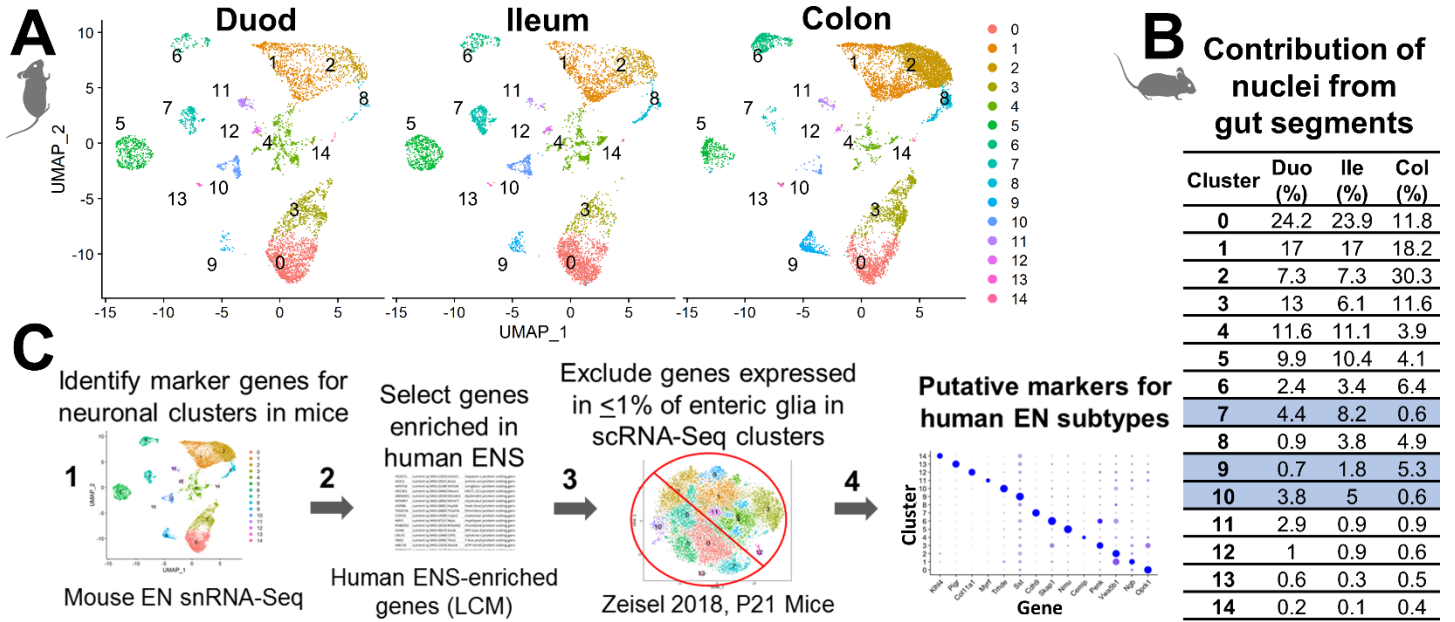

## D Putative subtype identities and top cluster markers

| Cluster | Proposed Subtype            | Known Markers       | Top 3 Mouse                   | Top 3 Human-Match             | % Tot. (Lit)              | % Obs.              |
|---------|-----------------------------|---------------------|-------------------------------|-------------------------------|---------------------------|---------------------|
| 0       | Excitatory longitudinal MMN | Calb2/Chat/ Tac1+/- | Brinp2/Fbxw15/Specp1          | Oprk1/Brinp2/Tmem132c         | 13% (1)                   | 18.7%               |
| 1       | Inhibitory longitudinal MMN | Nos1/Vip            | Ass1/Cygb/Col25a1             | Ngb/Gsg1/Col25a1              | 3% (1)                    | ~8.2% <sup>E</sup>  |
| 2       | Inhibitory circular MMN     | Nos1/Vip/Npy+/-     | Gm4876/Gm16083/Dsc2           | Vwa5b1/Sv2b/Oprd1             | 23% (1)                   | ~26.5% <sup>E</sup> |
| 3       | Excitatory circular MMN     | Chat/Tac1/Calb2+/-  | Tac1/Necab2/Htr2b             | Penk/Sncb/Olfm3               | 21% (1)                   | 7.7%                |
| 3s      | Ascending IN                | Chat/Tac1/Calb2+/-  | Kctd16/Unc5d <sup>^</sup>     | Kctd16/Unc5d <sup>^</sup>     | 4% (1)                    | ~2.6% <sup>E</sup>  |
| 4       | Unassigned                  | -                   | Slc24a3/Myh11/Carmn           | Cemip/Kcnp1                   | -                         | 8.1%                |
| 5       | IPAN                        | Calcb/Calb2+/-      | Nmu/Pcdh10/Cysltr2            | Nmu/Pcdh10/Cbln2              | ~9%** (1)                 | 7.5%                |
| 6       | IPAN                        | Nefl/Calb1[sparse]  | Nxph2/Cckar/Eif3h             | Skap1/Nefl/Nxph2              | ~9%** (1)                 | 4.0%                |
| 6s      | Serotonergic (Descend. IN)  | Nefl/5-HT           | Slc6a4/Carpt/Grp <sup>^</sup> | Slc6a4/Carpt/Grp <sup>^</sup> | 1% (1)                    | 0.5%                |
| 7       | Type I/'simple'             | Nefl                | Cdh9/Zim1/B230209E15Rik       | Cdh9/Mgat4c/Klhl1             | ~9%** (1,2)               | 3.5%                |
| 7s      | Intestinofugal***           | Chat +/-Cck/Grp     | Slc24a3/Carmn <sup>^</sup>    | Slc24a3/Carmn <sup>^</sup>    | ~0.25% <sup>G</sup> (1,3) | 0.3%                |
| 8       | Unassigned                  | Nos1/Gal/Sst(low)   | *No highly-selective markers  | *No selective markers         | -                         | 3.6%                |
| 9       | Descending IN (Filamentous) | Sst/Calb2/Th        | Adamts1/Gm30382/Irf1          | Sst/Galnt5/Pantr1             | 4% <sup>F</sup> (1)       | 3.0%                |
| 10      | Descending IN (Type I)      | Chat/Nos1/Gad2      | Neurod6/AI593442/Bcr          | Trhde/Bean1/Neurod6           | 3% (1)                    | 2.8%                |
| 11      | Unassigned                  | -                   | C3/Igfbp6/Upk3b               | Myrf/Nkain4/Cldn15            | -                         | 1.4%                |
| 12      | Unassigned                  | -                   | Cdh19/Apoe/Col11a1            | Col11a1/Tmprss5/Car12         | -                         | 0.82%               |
| 13      | Unassigned                  | -                   | Reg3b/Pigr/Epcam              | Pigr/Klf5/Cdh1                | -                         | 0.45%               |
| 14      | Unassigned                  | -                   | Ccl21a/Mmnr1/Pecam1           | Klhl4/Arap3/Radil             | -                         | 0.03%               |

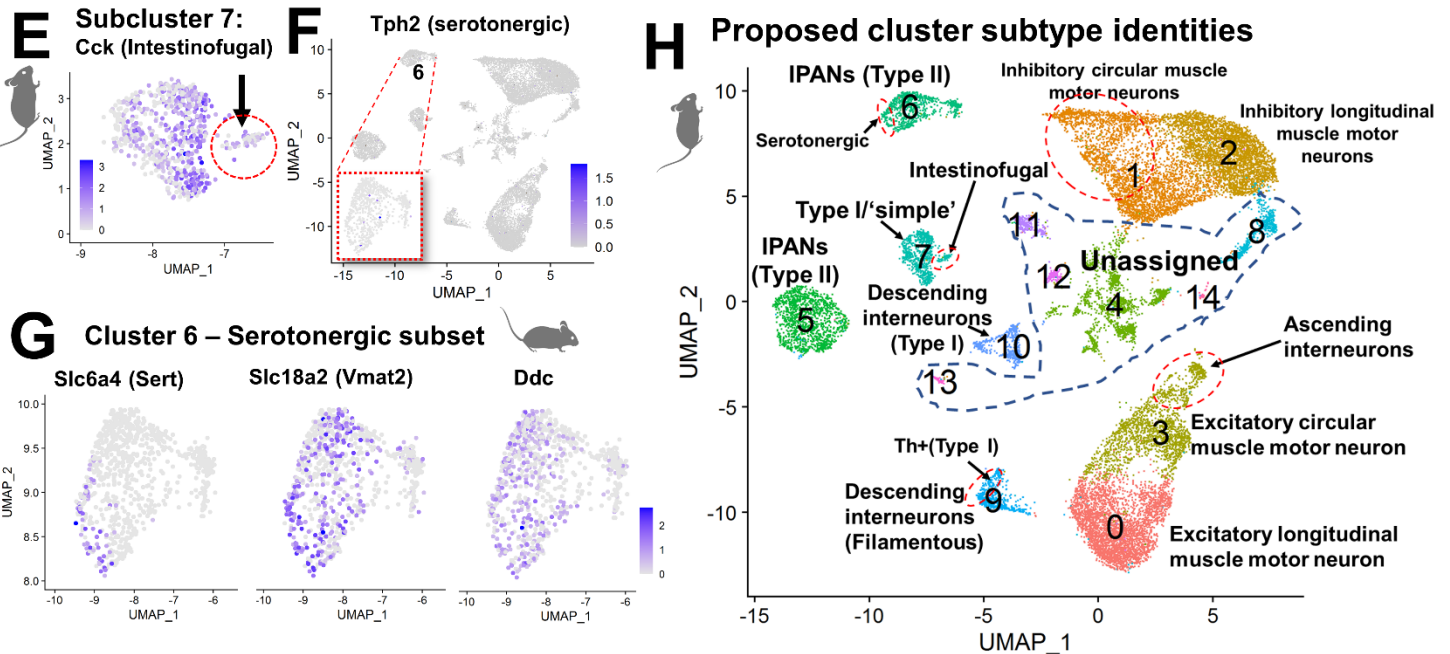

# Figure S4

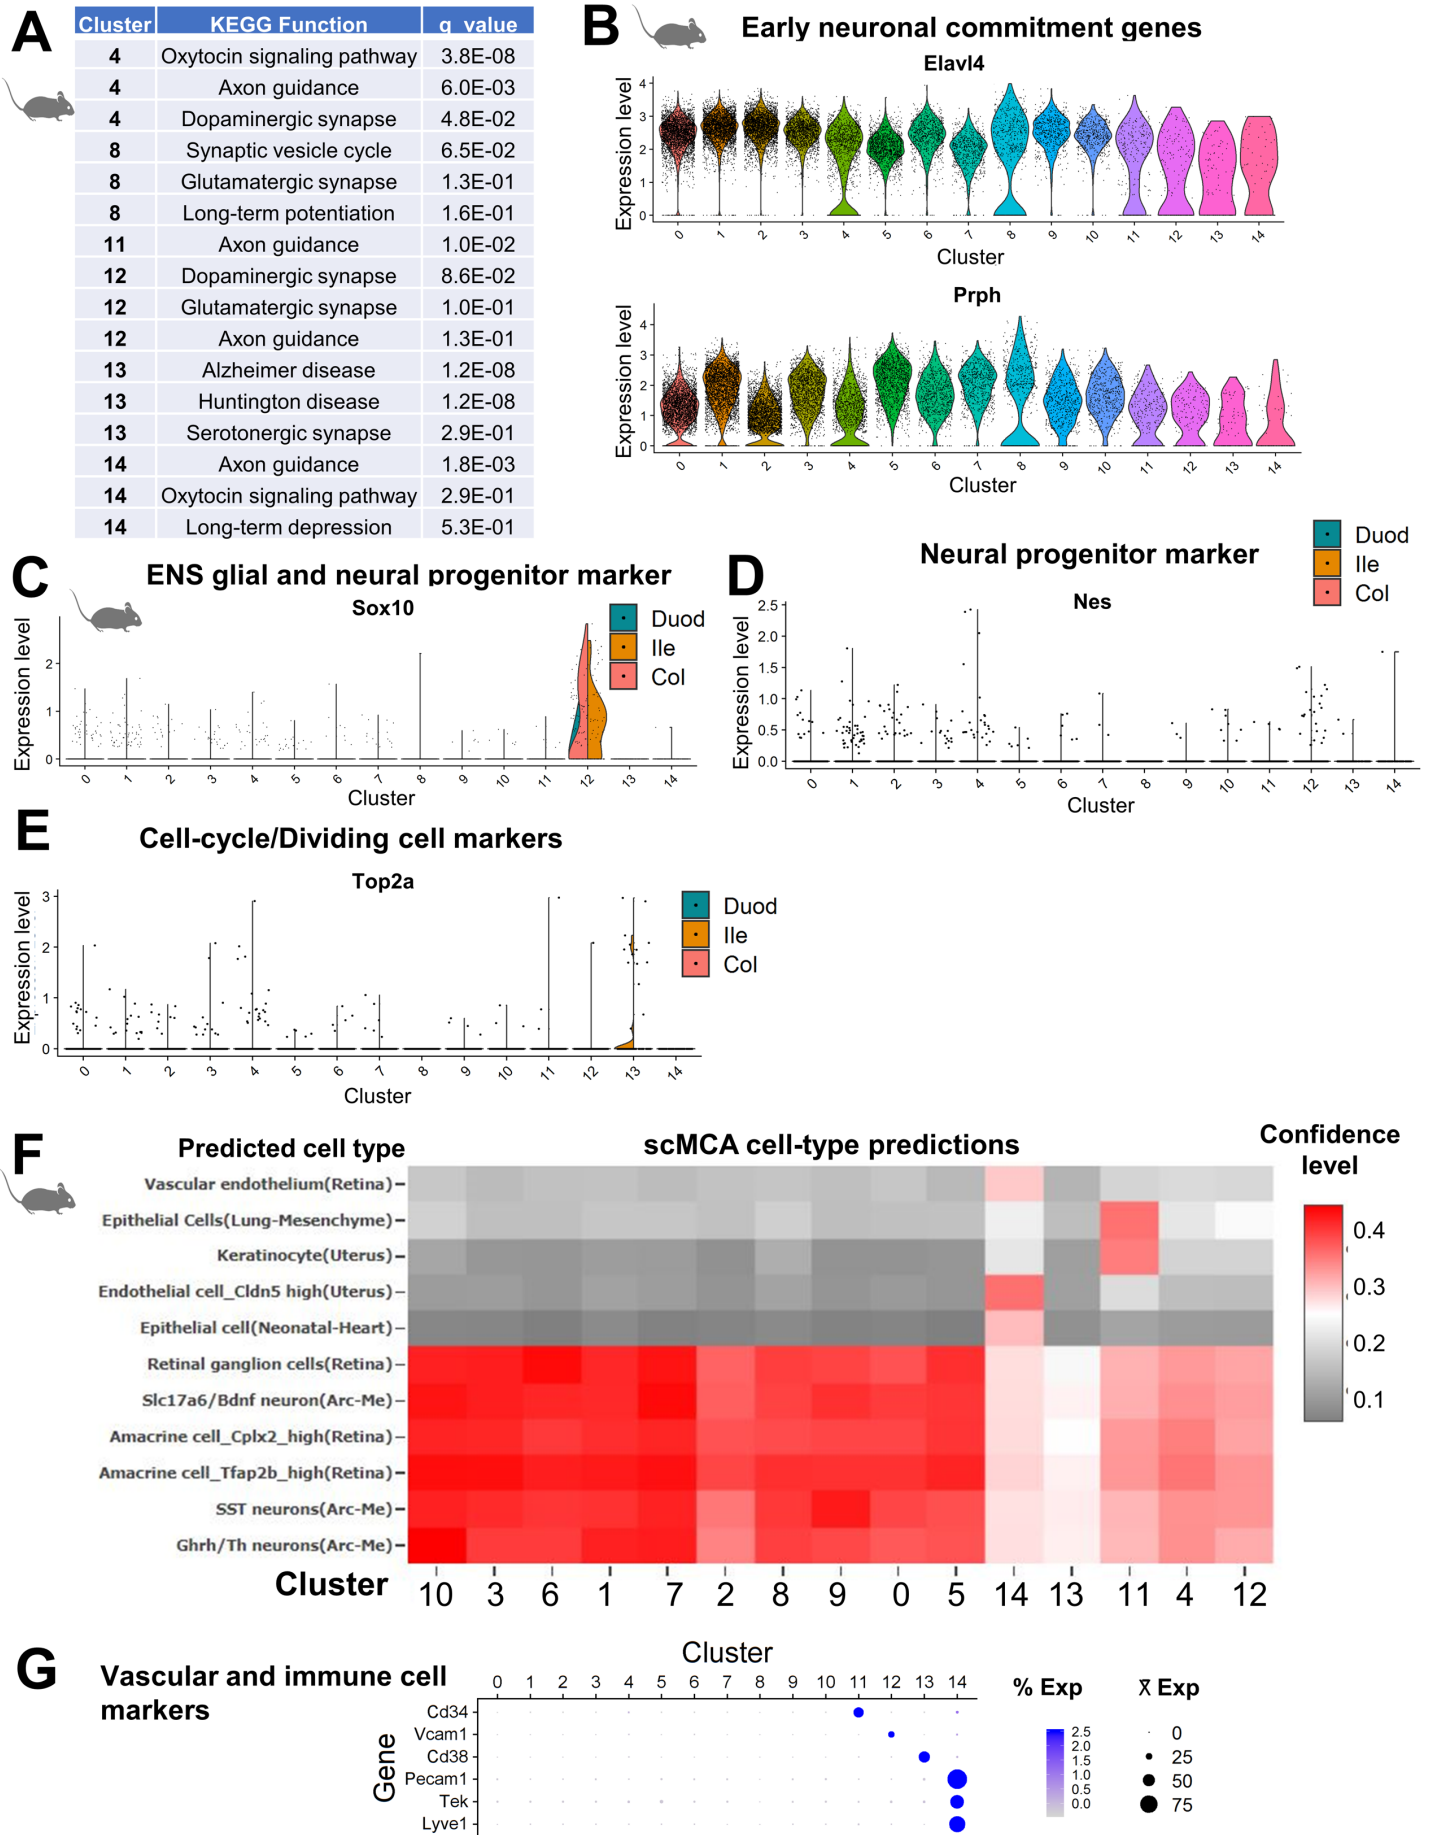

# Figure S5

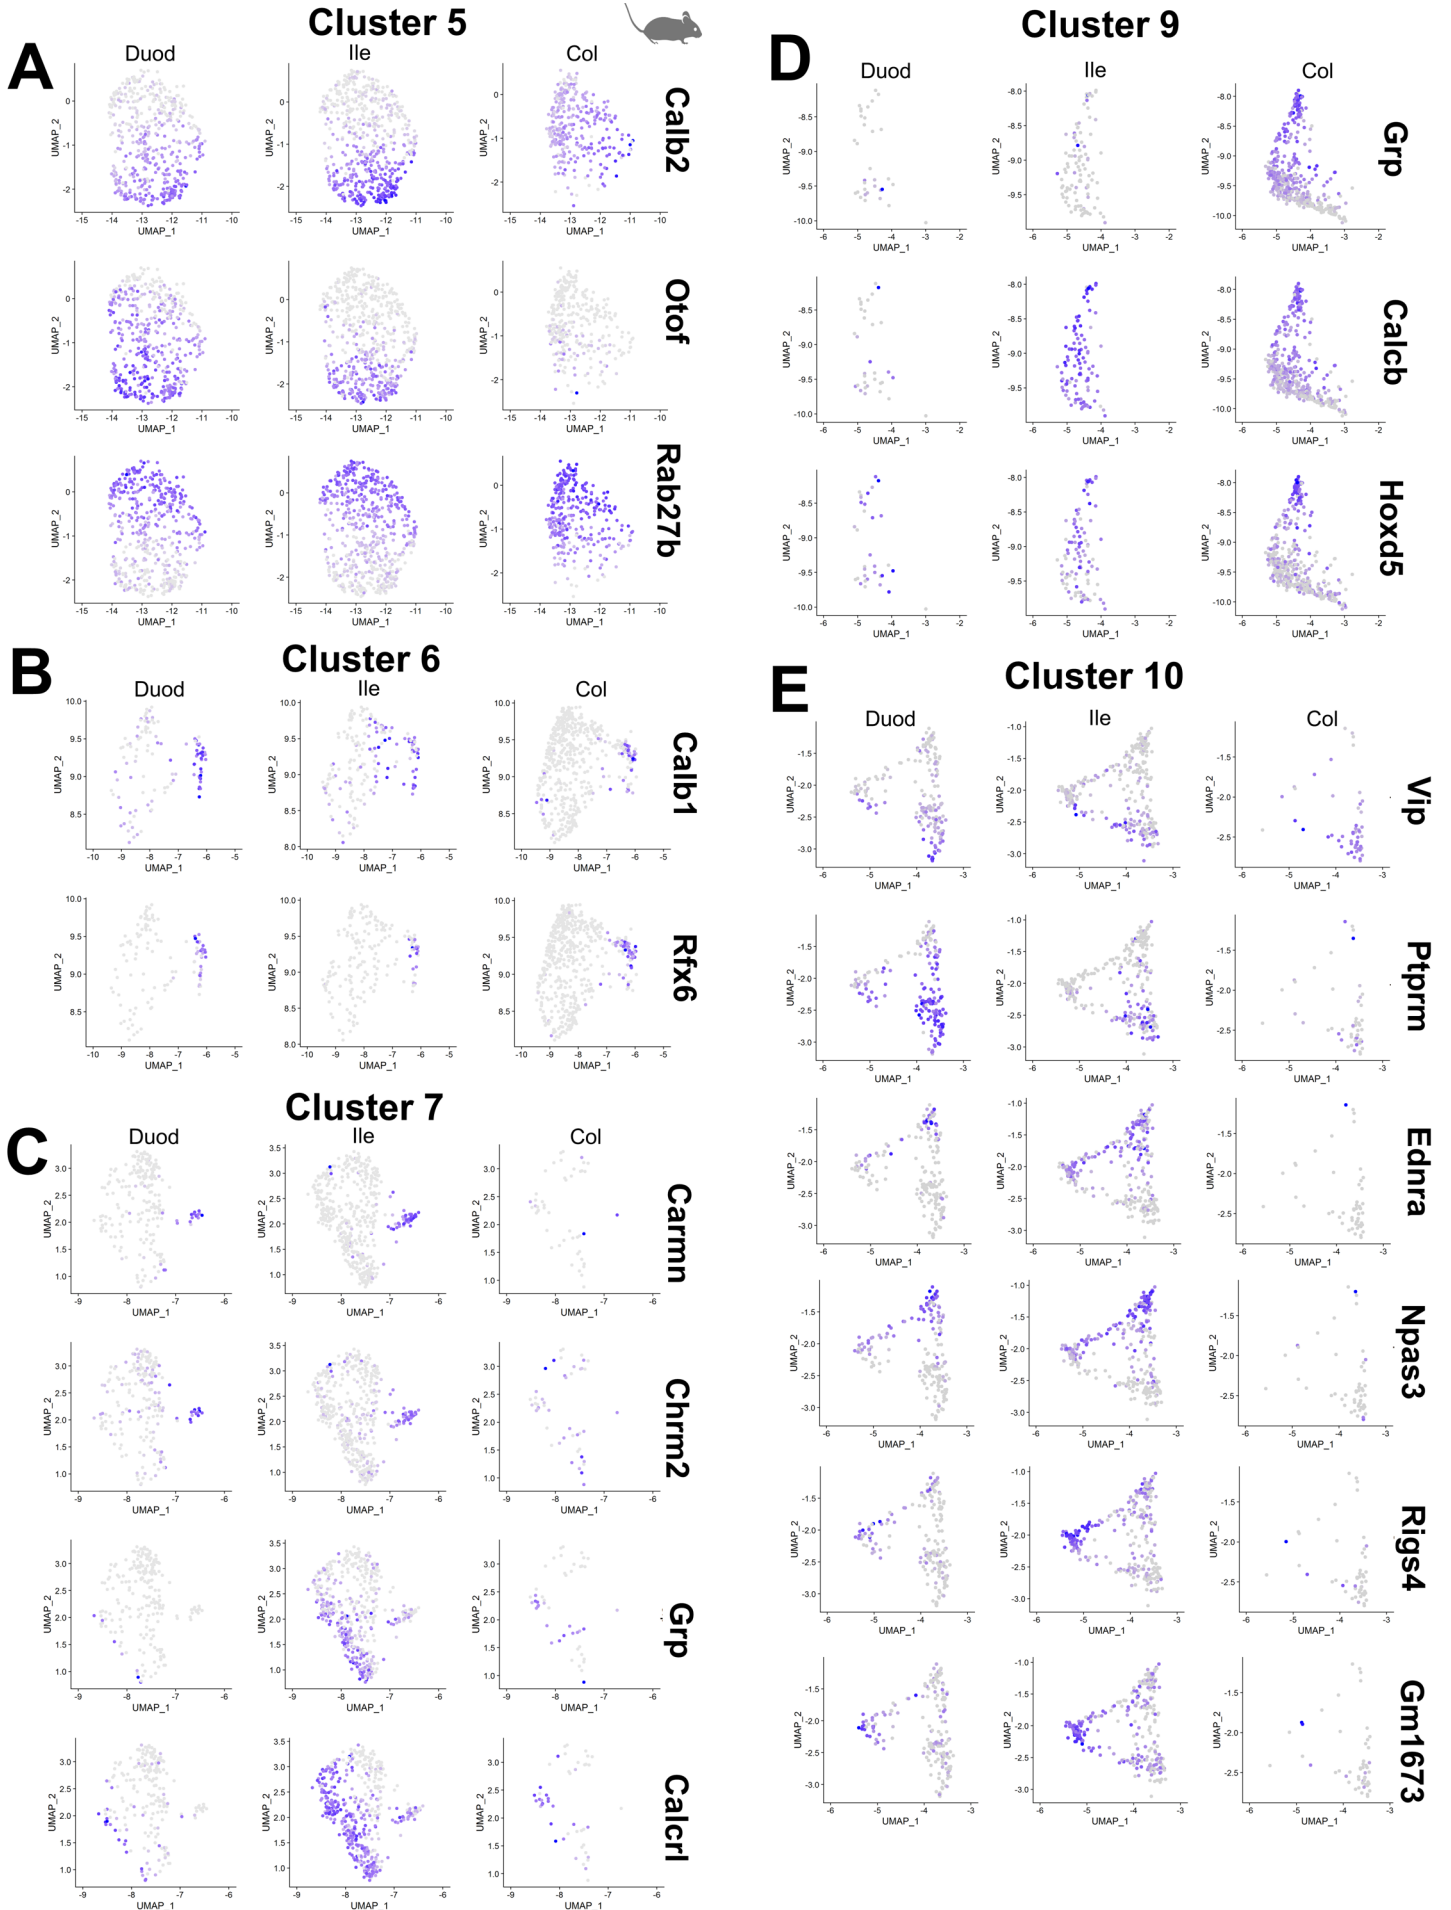

**Figure S6**

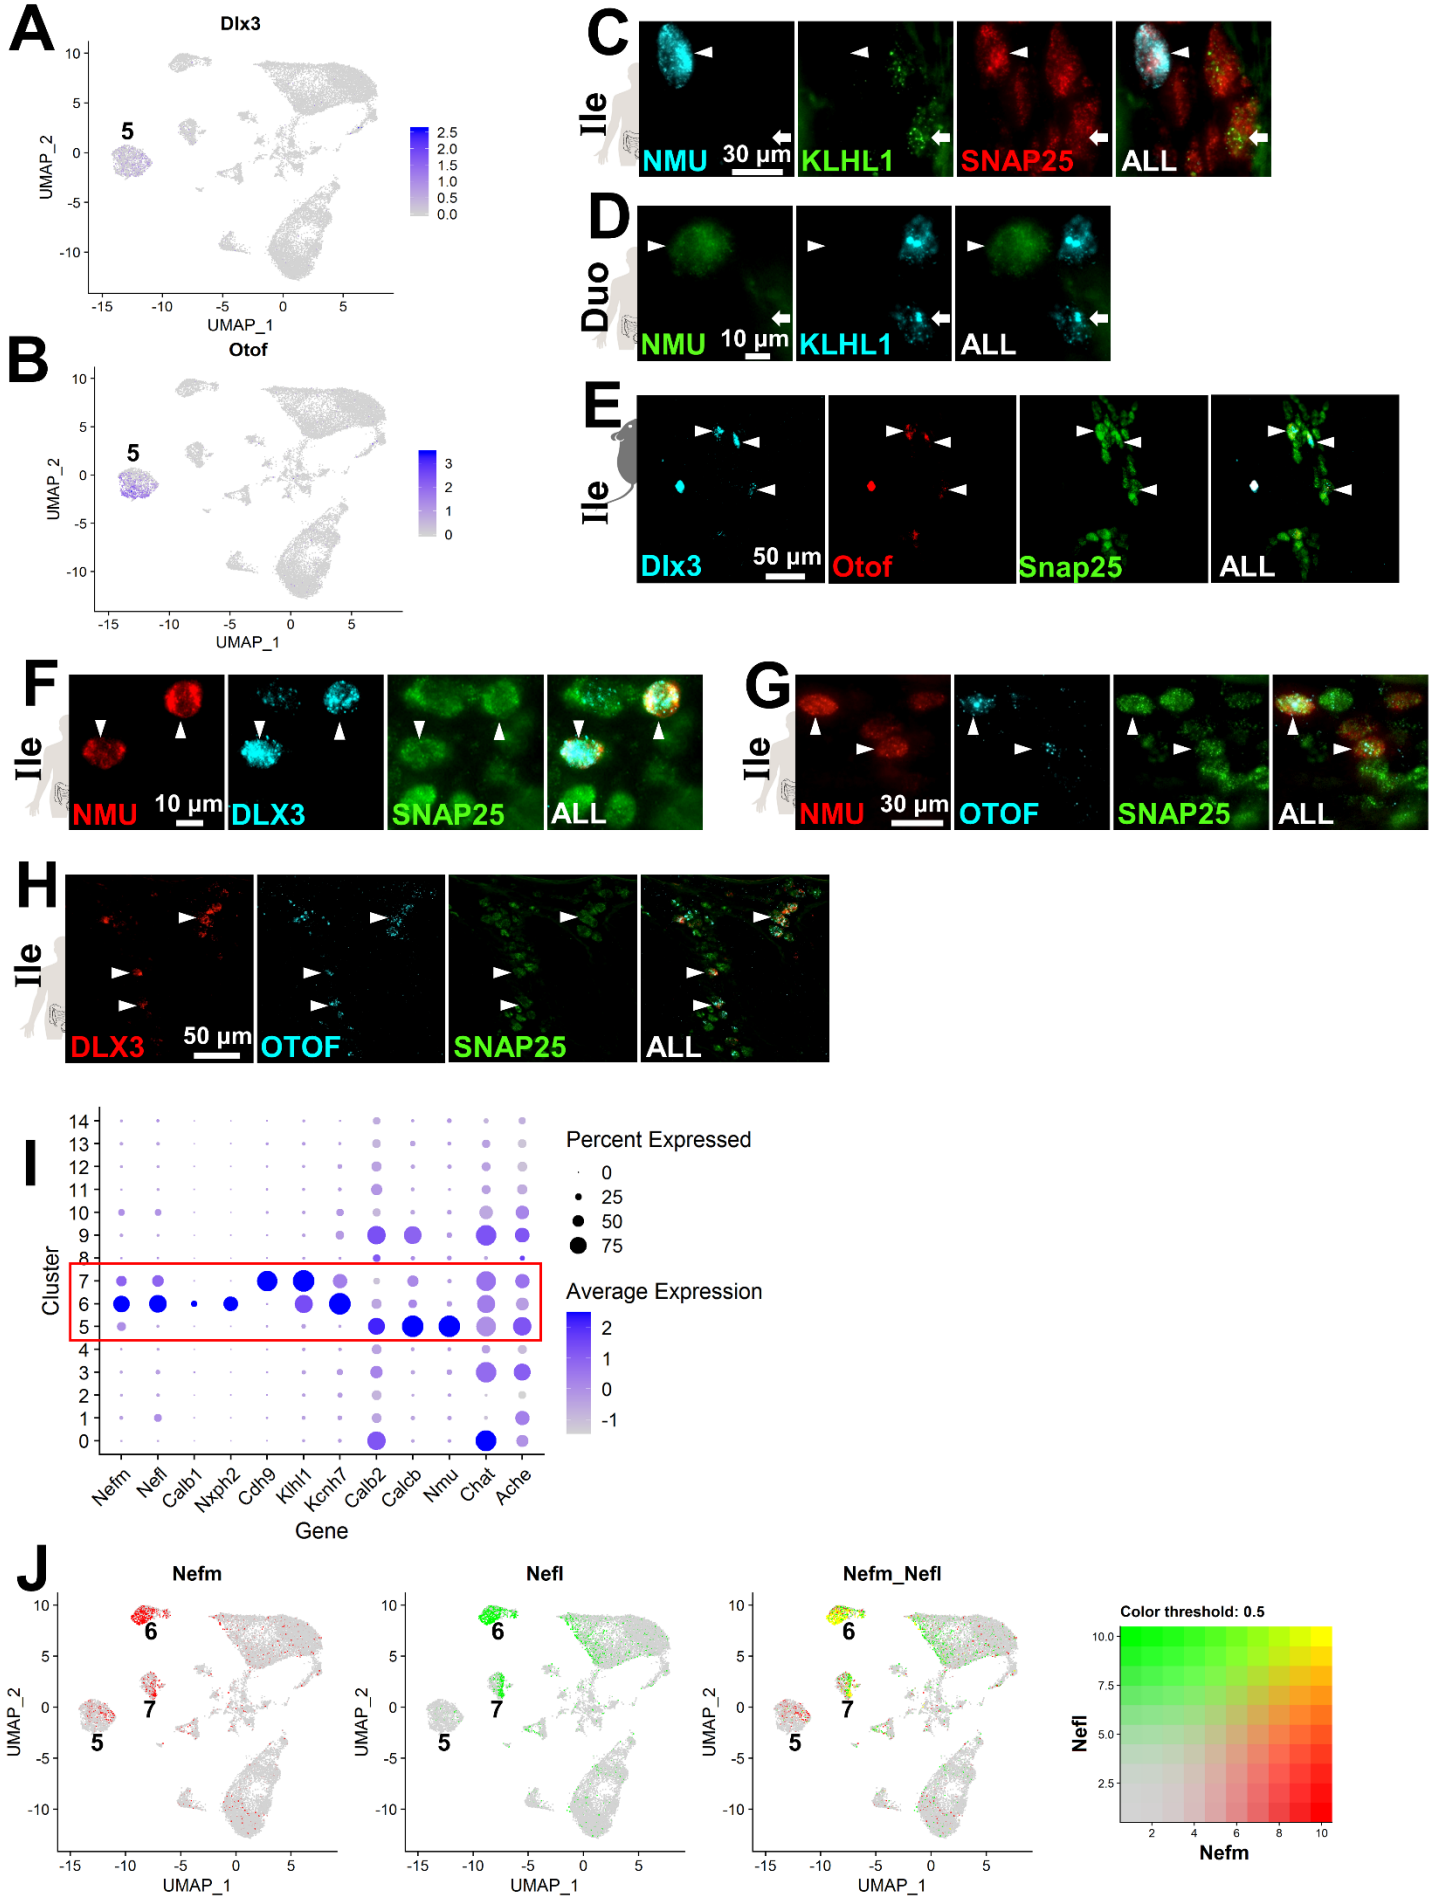

Figure S7

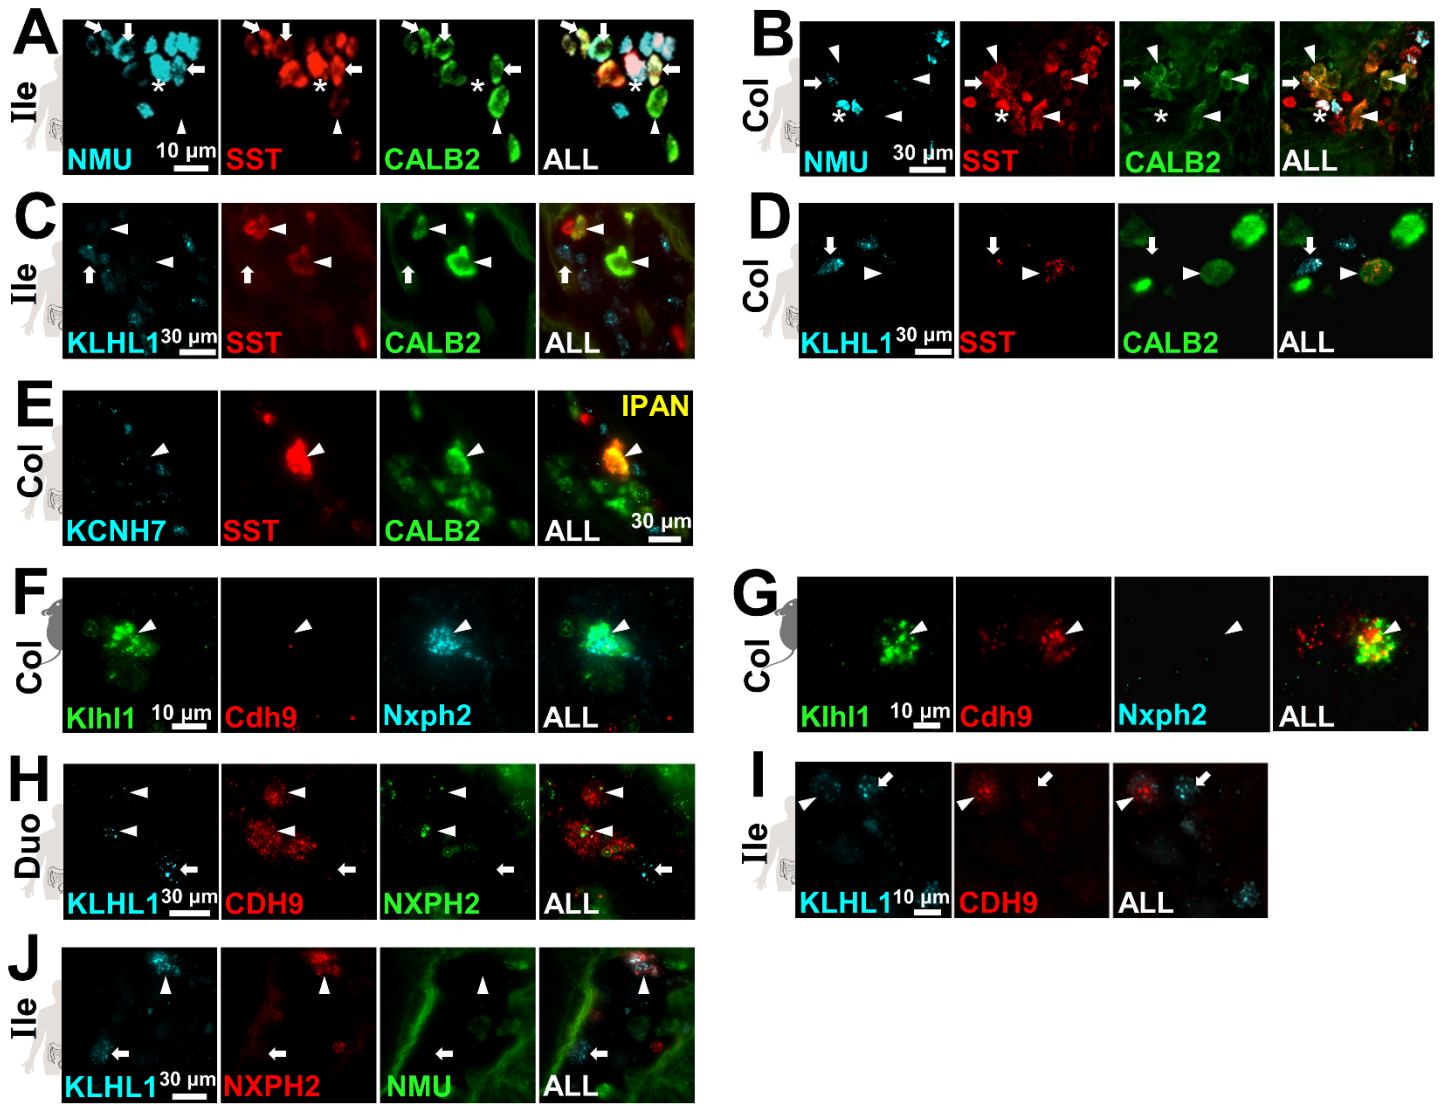

**Figure S8**

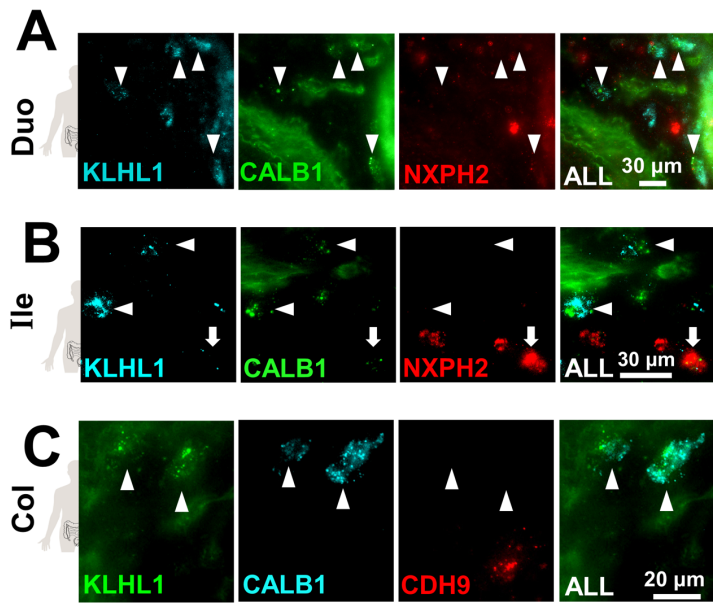



**Figure S9**

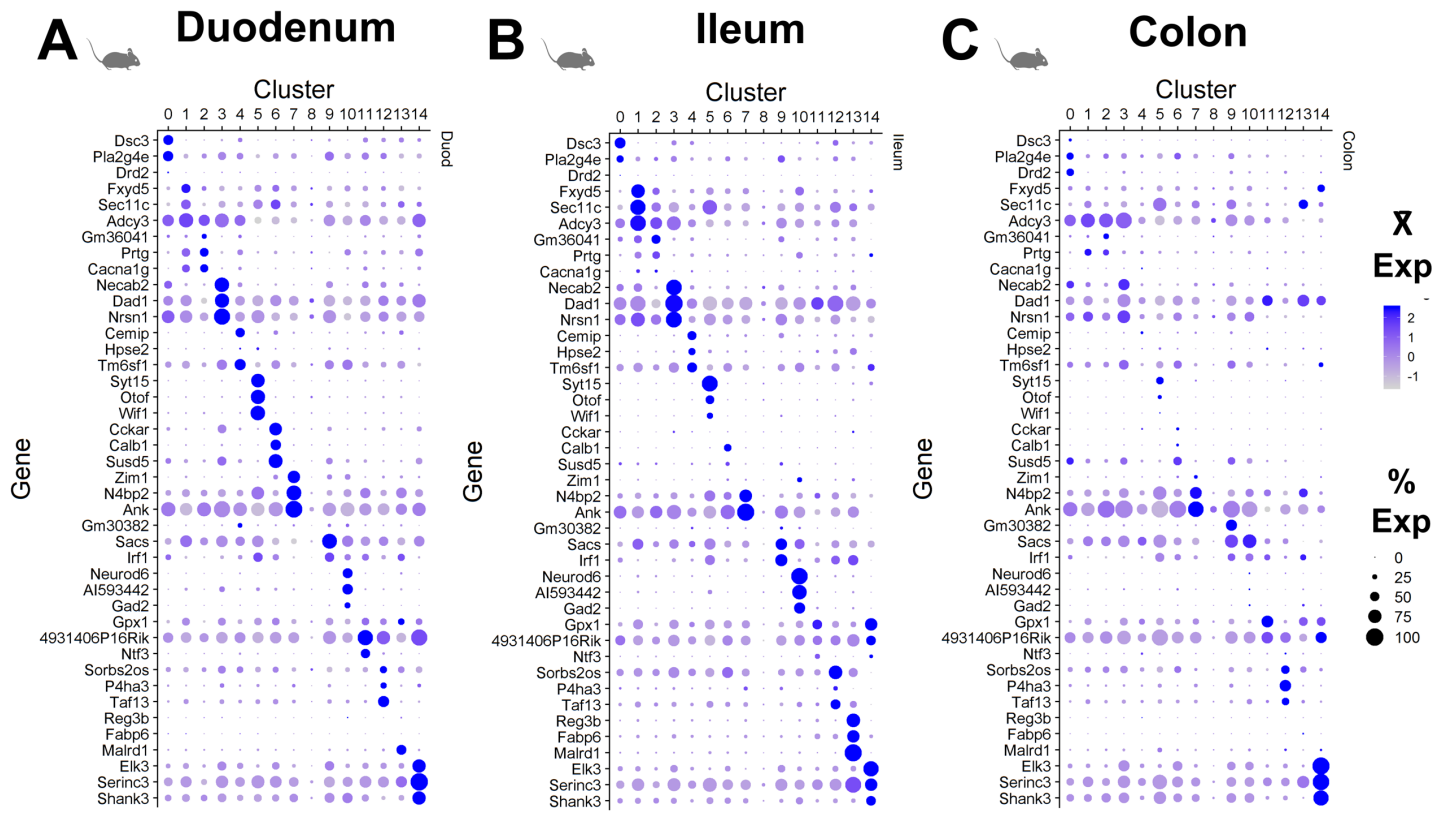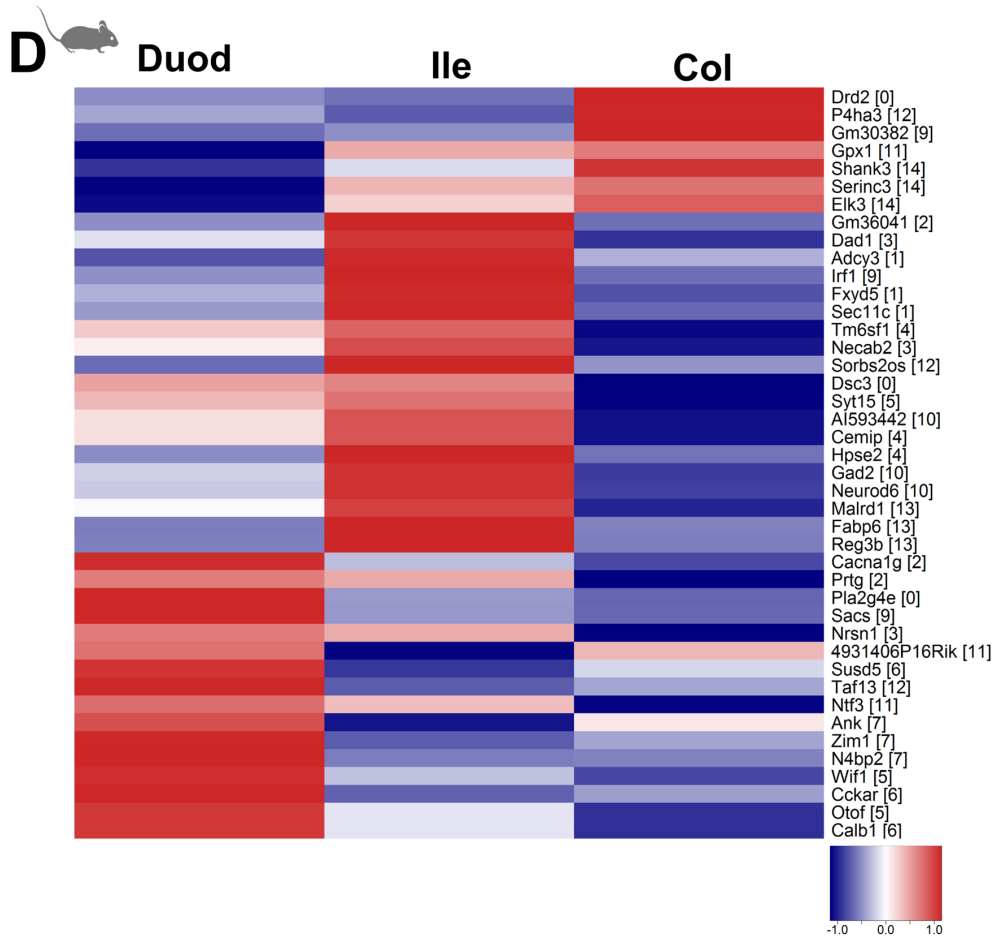

**Figure S10**

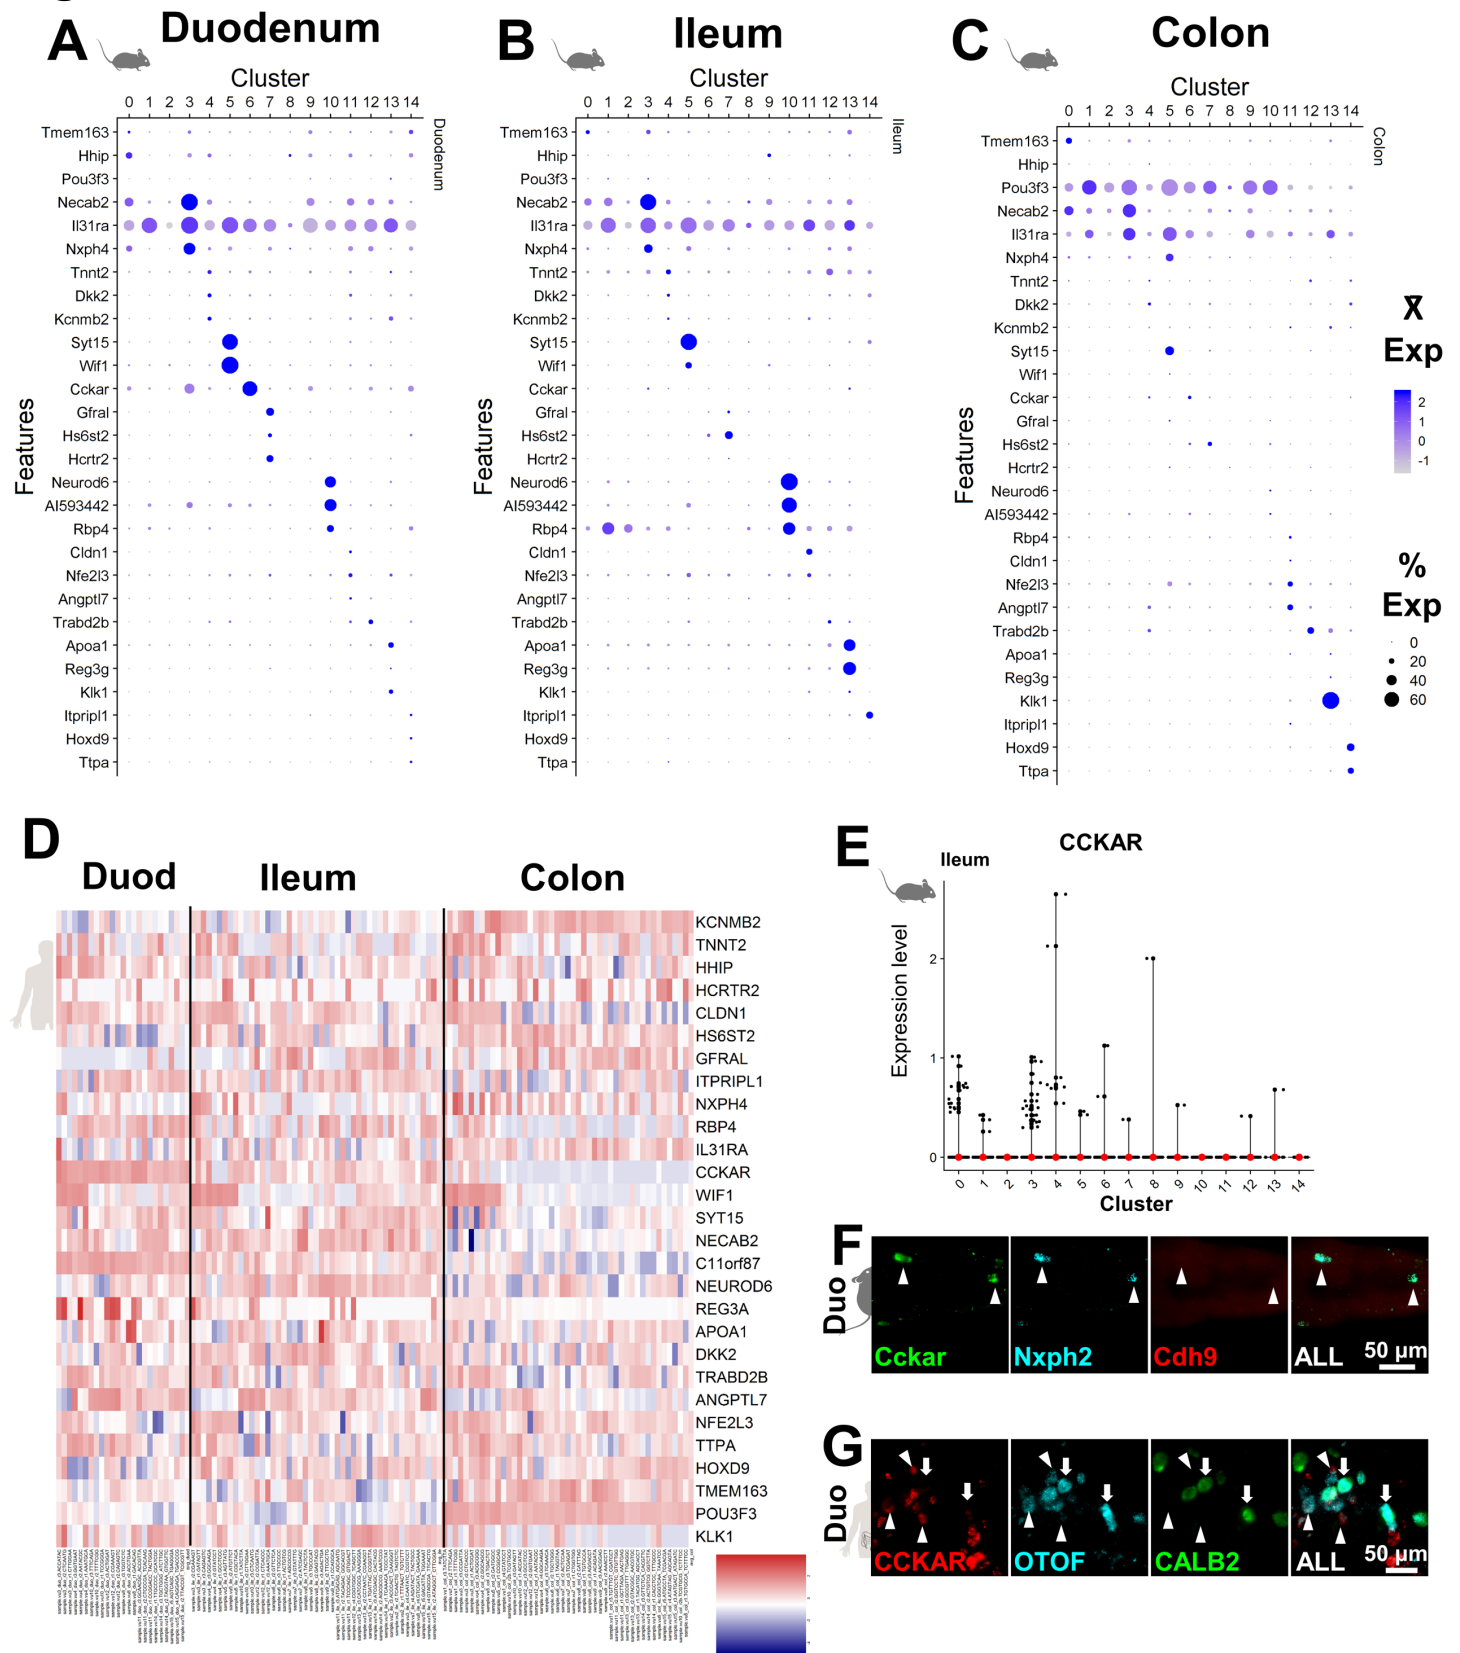

**Figure S11**

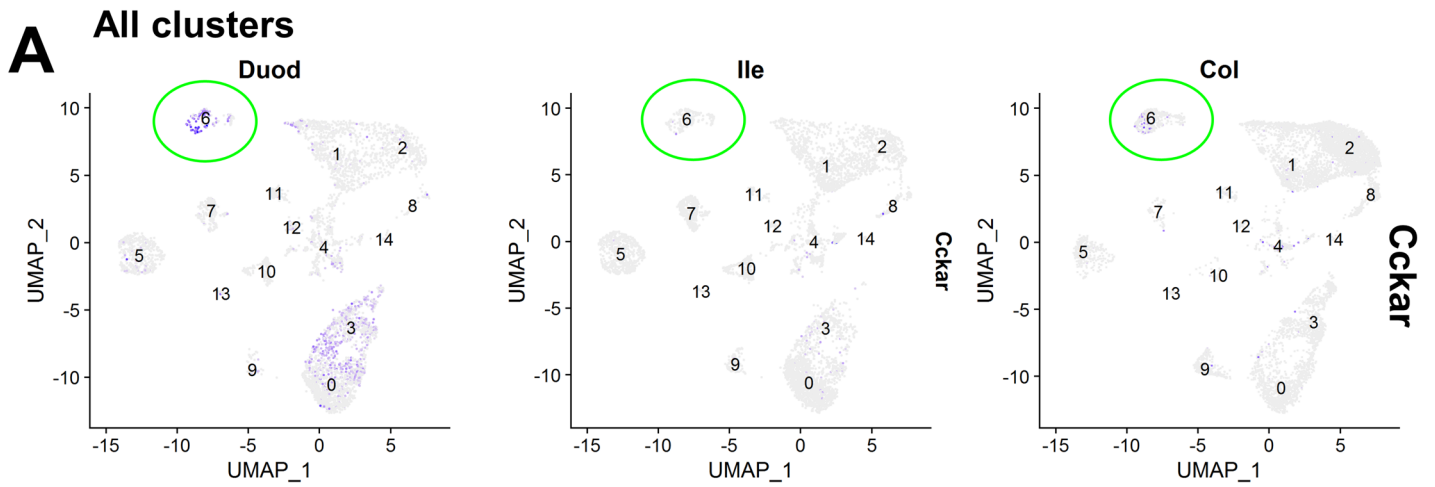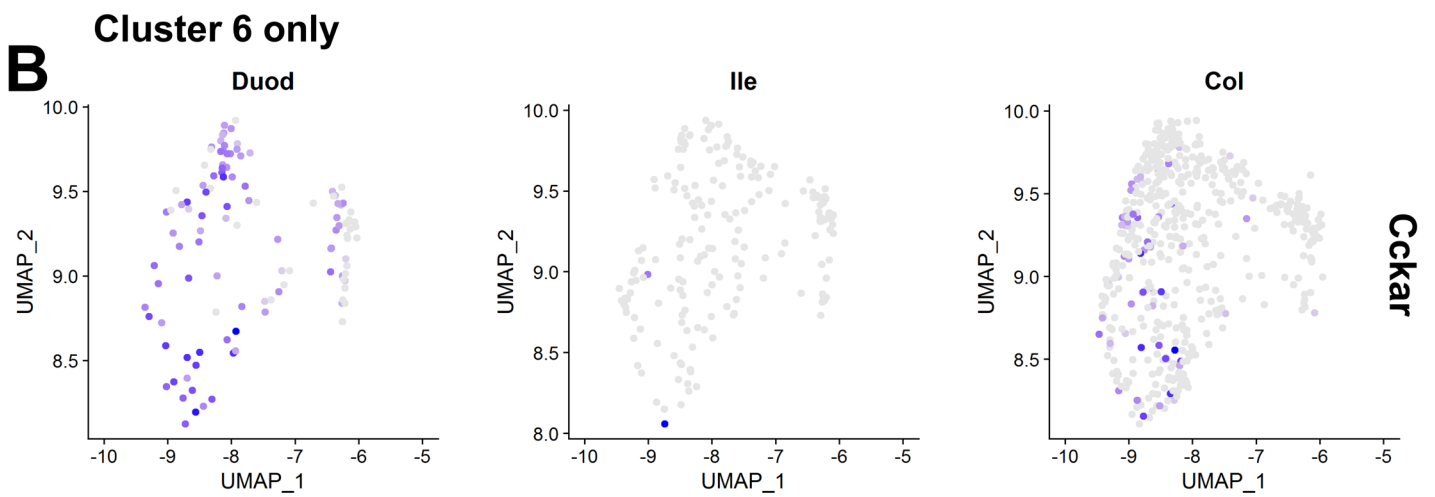

**Regional expression of Cckar in neuronal cluster 6 in mice**

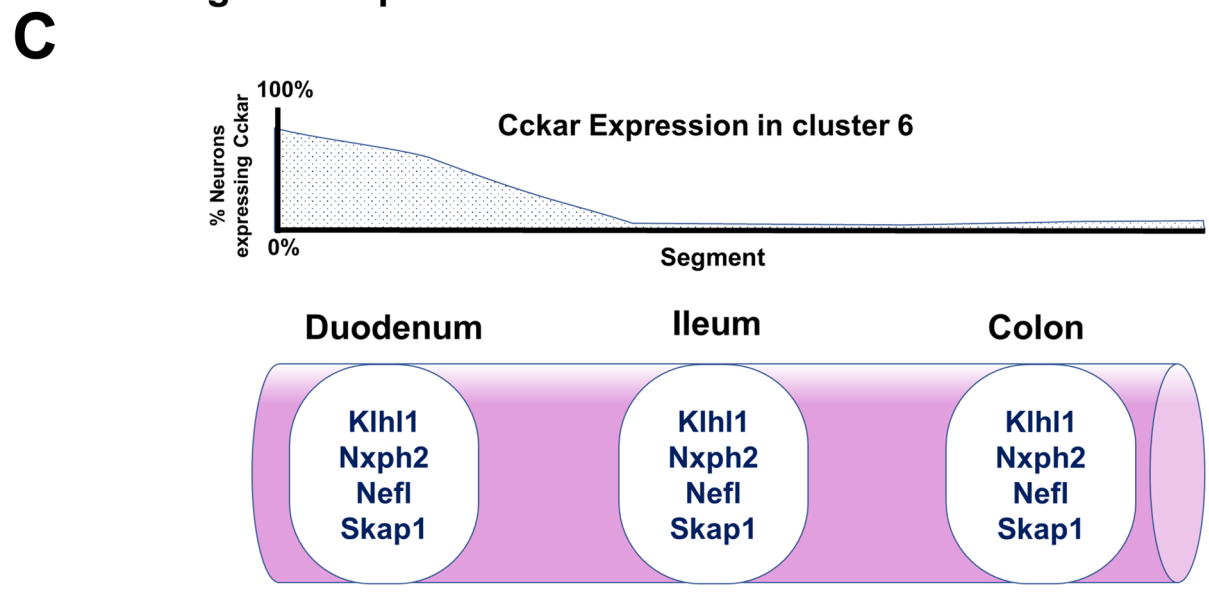

# Figure S12

## A

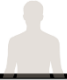

| Gene              | Sex    | logFC               | Segment(s)    |
|-------------------|--------|---------------------|---------------|
| <i>XIST</i>       | Female | 5.5, 5.0, 4.7       | Col, Ile, Duo |
| <i>AC005332.2</i> | Female | 5.1                 | Duo           |
| <i>SLC6A14</i>    | Female | 1.3                 | Col           |
| <i>TACSTD2</i>    | Female | 1.2                 | Col           |
| <i>LINC02529</i>  | Female | 1.2                 | Col           |
| <i>MUC5B</i>      | Female | 1.1                 | Col           |
| <i>ZNF516</i>     | Female | 1.1                 | Col           |
| <i>PLXNB3</i>     | Female | 1.1                 | Col           |
| <i>RPTOR</i>      | Female | 1                   | Col           |
| <i>RN7SL2</i>     | Female | 1                   | Col           |
| <i>RPS4Y1</i>     | Male   | -12.0, -10.9, -10.3 | Ile, Col, Duo |
| <i>EIF1AY</i>     | Male   | -11.1, -10.4, -10.3 | Ile, Col, Duo |
| <i>DDX3Y</i>      | Male   | -10.0, -9.6         | Ile, Col, Duo |
| <i>NLGN4Y</i>     | Male   | -9.3, -9.1, -8.7    | Ile, Duo, Col |
| <i>UTY</i>        | Male   | -8.5, -7.8, -7.6    | Ile, Duo, Col |
| <i>ZFY</i>        | Male   | -8.3, -7.7, -7.6    | Ile, Col, Duo |
| <i>KDM5D</i>      | Male   | -7.6, -7.4, -6.7    | Ile, Duo, Col |
| <i>USP9Y</i>      | Male   | -7.1, -7.0, -6.8    | Duo, Ile, Col |
| <i>TMSB4Y</i>     | Male   | -6.7, -6.3          | Ile, Col, Duo |
| <i>TTY14</i>      | Male   | -6.3, -6.0, -5.2    | Ile, Col, Duo |

## B

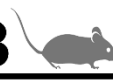

| Gene            | Sex    | Avg logFC | Cluster(s) | Segment(s)    | % Cell Exp Diff |
|-----------------|--------|-----------|------------|---------------|-----------------|
| <i>Xist</i>     | Female | 2.4       | ALL        | Col, Ile, Duo | 98%             |
| <i>Tsix</i>     | Female | 1         | ALL        | Ile, Duo, Col | 81%             |
| <i>Sst</i>      | Female | 1         | 0          | Col           | 10%             |
| <i>Cntnap5a</i> | Female | 1.7       | 5          | Duo, Ile, Col | 47%             |
| <i>Uty</i>      | Male   | -1.1      | ALL        | Col, Duo, Ile | -89%            |
| <i>Eif2s3y</i>  | Male   | -0.8      | ALL        | Ile, Duo, Col | -77%            |
| <i>Ddx3y</i>    | Male   | -0.5      | ALL        | Duo, Ile, Col | -68%            |
| <i>Kdm5d</i>    | Male   | -0.3      | 5, 10      | Col, Duo      | -62%            |

## C

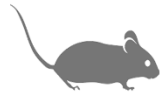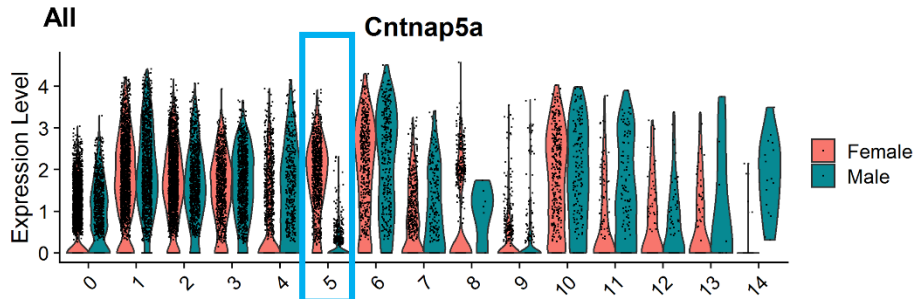

## D

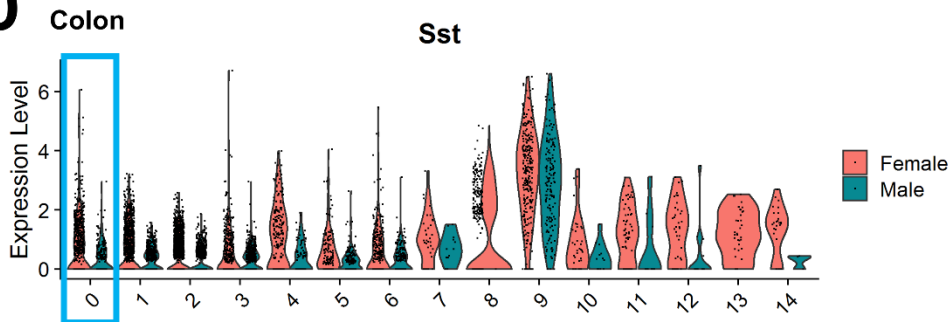

## E

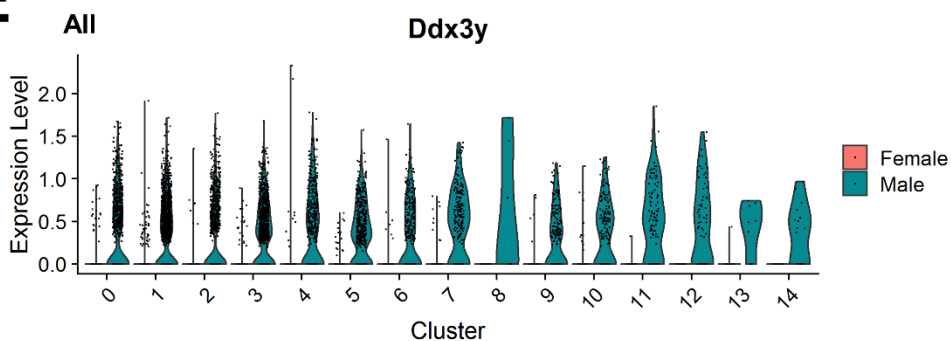

# Figure S13

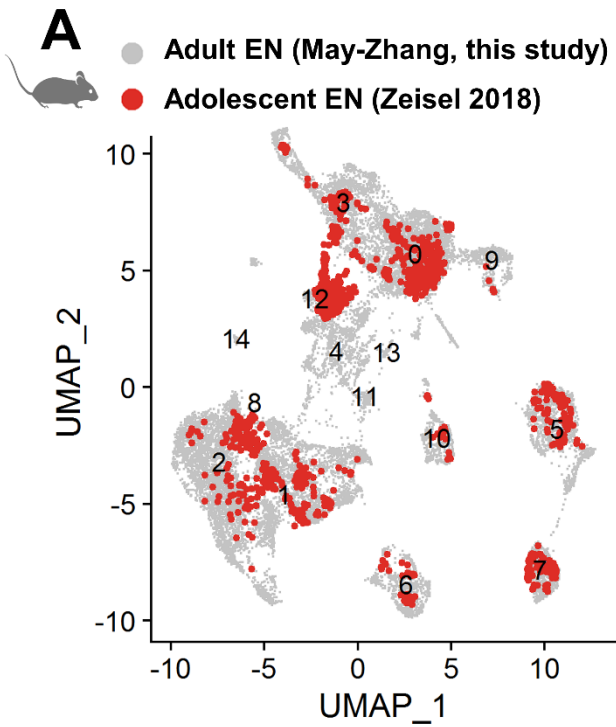

**B**



| Cluster | Proposed Identity                            | Adult EN (% Total) | Juvenile EN (% Total) |
|---------|----------------------------------------------|--------------------|-----------------------|
| 0       | Excitatory longitudinal muscle motor neurons | 18.6%              | 21.6%                 |
| 1       | Inhibitory longitudinal muscle motor neurons | 17.5%              | 19.3%                 |
| 2       | Inhibitory circular muscle motor neurons     | 17.4%              | 10.9%                 |
| 3       | Excitatory circular muscle motor neurons     | 10.3%              | 8.4%                  |
| 4       | Unassigned                                   | 8.1%               | 8.0%                  |
| 5       | IPAN                                         | 7.5%               | 7.1%                  |
| 6       | IPAN                                         | 4.5%               | 6.8%                  |
| 7       | (Type I/'simple')                            | 3.8%               | 6.7%                  |
| 8       | Unassigned                                   | 3.5%               | 5.9%                  |
| 9       | Descending interneurons (Filamentous)        | 3.0%               | 3.1%                  |
| 10      | Descending interneurons (Type I)             | 2.8%               | 2.3%                  |
| 11      | Unassigned                                   | 1.4%               | 0.0%                  |
| 12      | Unassigned                                   | 0.8%               | 0.0%                  |
| 13      | Unassigned                                   | 0.4%               | 0.0%                  |
| 14      | Unassigned                                   | 0.3%               | 0.0%                  |
